# Supplementary material for: New Sustainable Synthetic Routes to Cyclic Oxyterpenes Using the Ecocatalyst Toolbox
Source: MDPI journal article supplement (doi:10.3390/molecules26237194), 2021-11-27
Supplement: s1 [file s1]

# New sustainable synthetic routes to cyclic oxyterpenes using the Ecocatalyst toolbox - Supporting informations.

Camille Bihanic <sup>1†</sup>, Arthur Lasbleiz <sup>1†</sup>, Morgan Regnier <sup>1</sup>, Eddy Petit <sup>2</sup>, Pierre Le Blainvaux <sup>3</sup>, and Claude Grison <sup>1,3,\*</sup>

1 Laboratory of Bio-inspired Chemistry and Ecological Innovations (ChimEco), UMR 5021, CNRS – University of Montpellier  
Cap Delta, 1682 rue de la Valsière, 34790 Grabels, France

2 European Institute of Membrane (IEM), UMR 5635 – University of Montpellier  
163 rue Auguste Broussonet, 34090 Montpellier, France

3 BioInspir  
Cap Delta, 1682 rue de la Valsière, 34790 Grabels, France

\* Correspondence: [claude.grison@cnrs.fr](mailto:claude.grison@cnrs.fr)

† These authors contributed equally to this work.

## Table des matières

|     |                                 |   |
|-----|---------------------------------|---|
| I.  | <sup>1</sup> H NMR spectra..... | 2 |
| II. | Scale-up procedures.....        | 3 |

# I. <sup>1</sup>H NMR Spectra

β-pinene oxide in acetone-d<sub>6</sub>

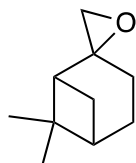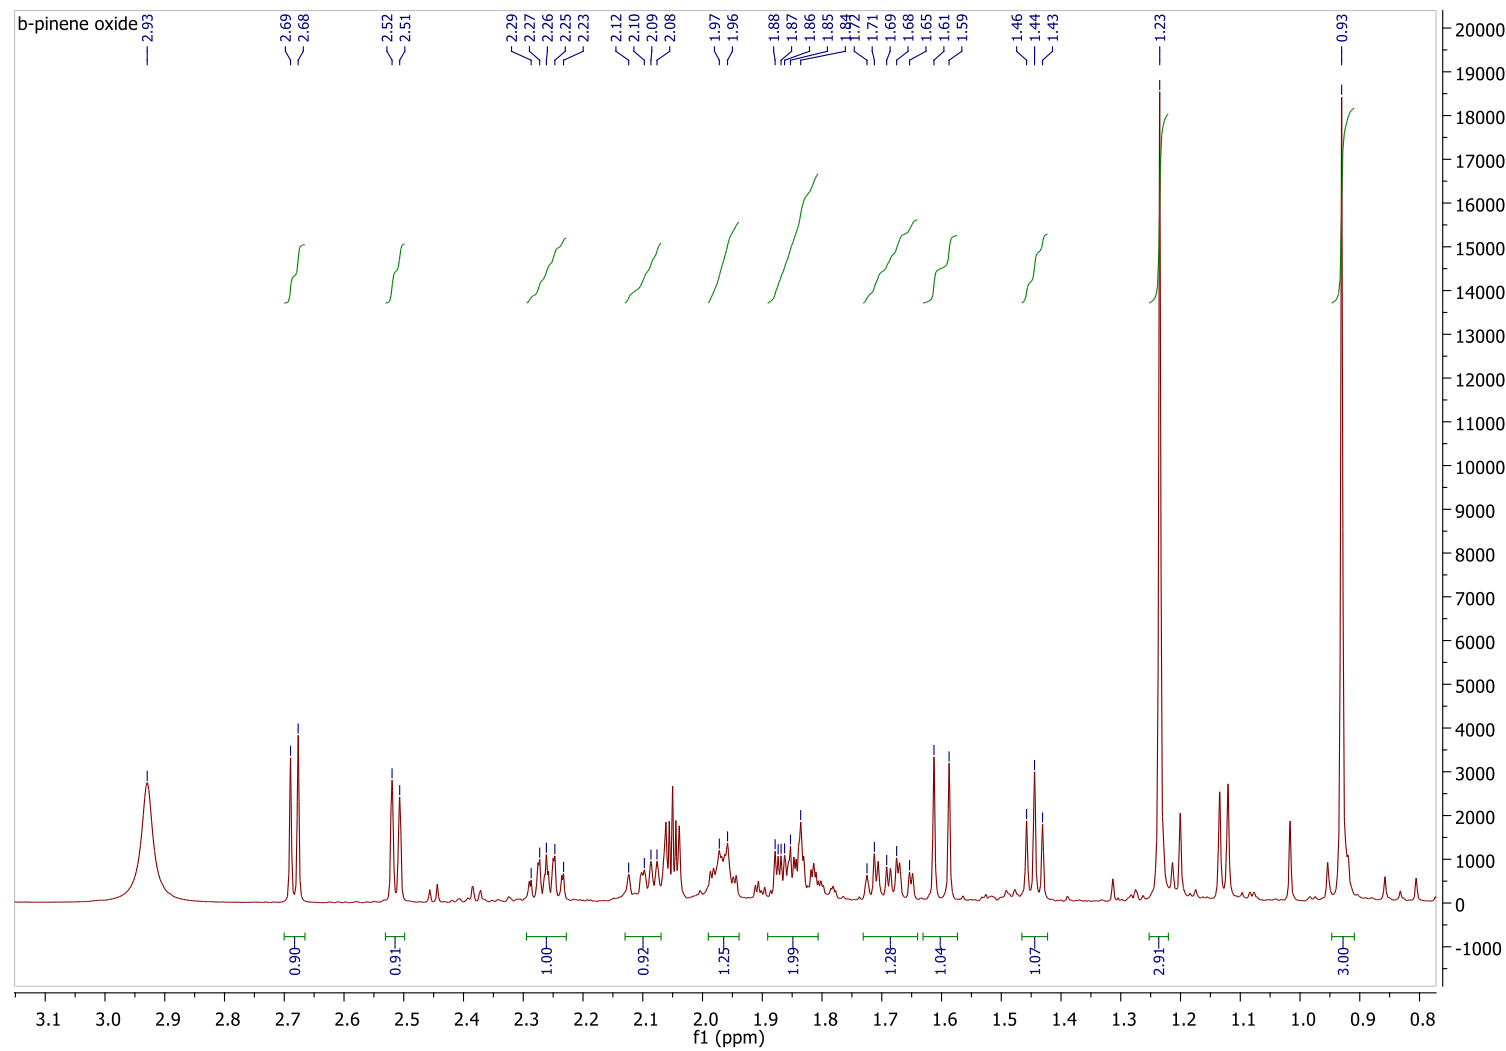

Myrtenol in acetone-d<sub>6</sub>

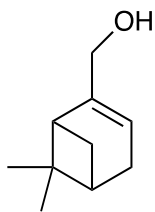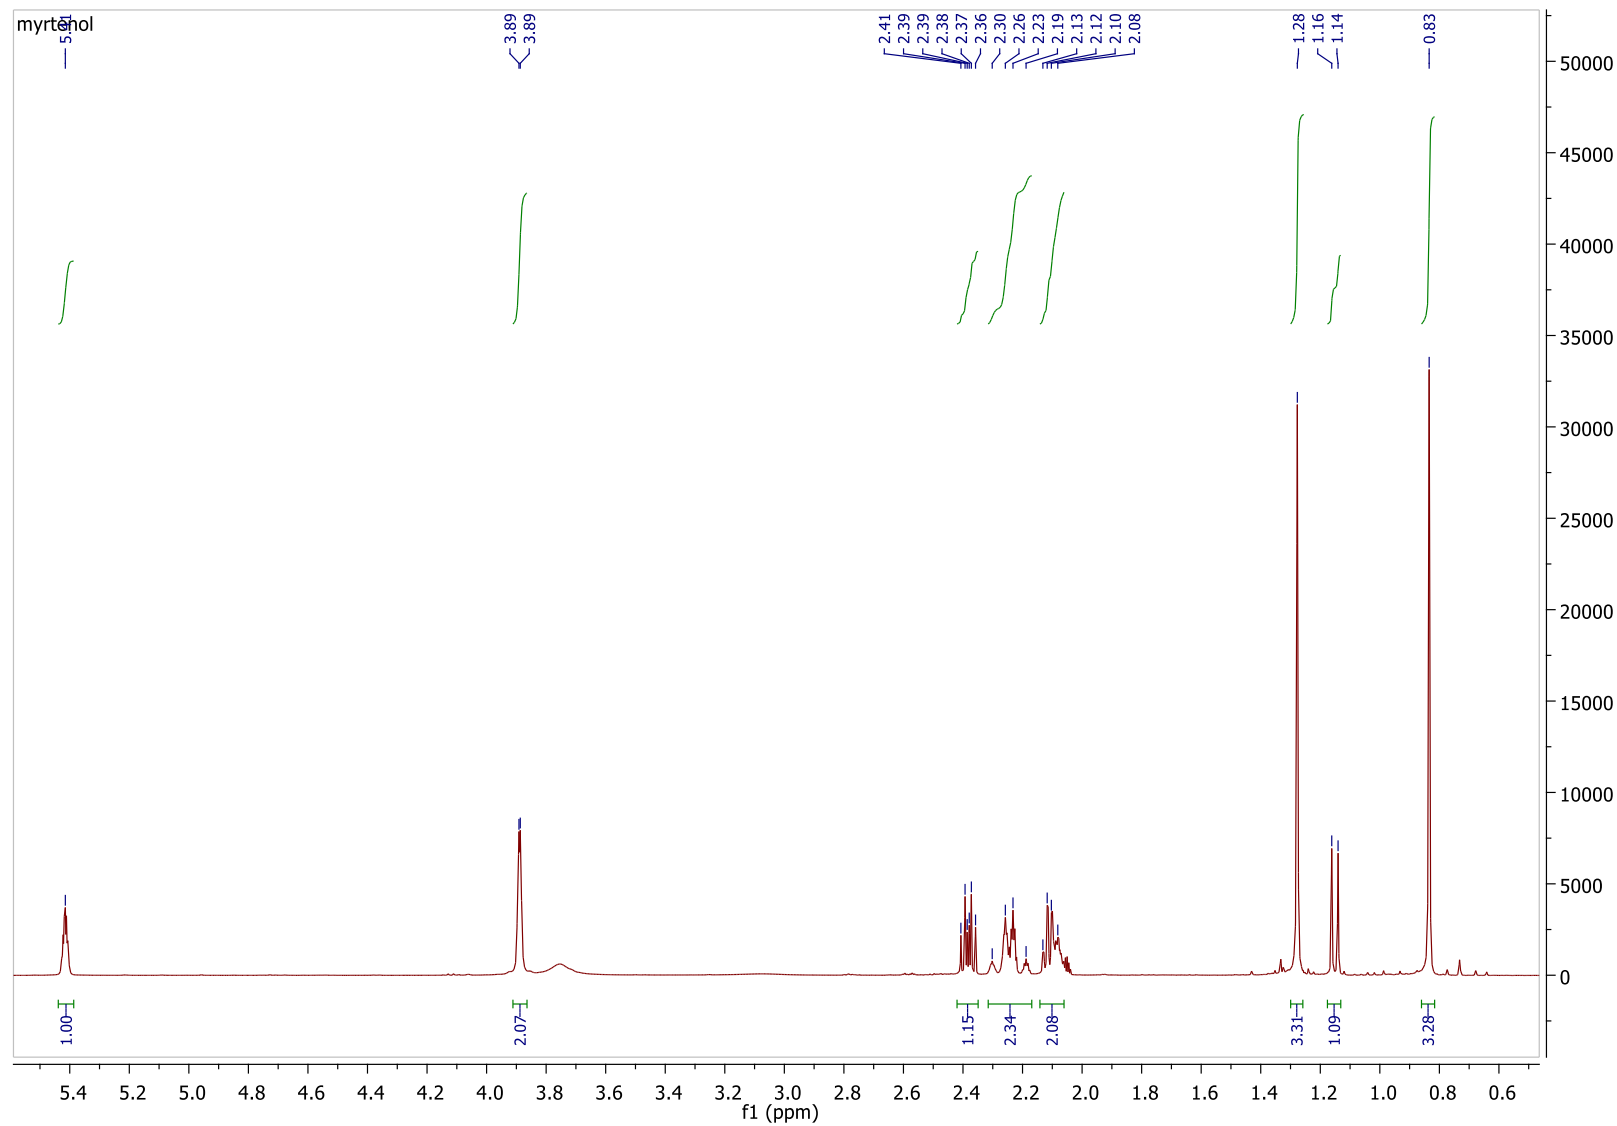

7-Hydroxyterpineol in acetone-d<sub>6</sub>

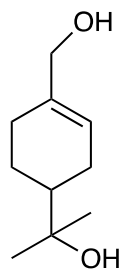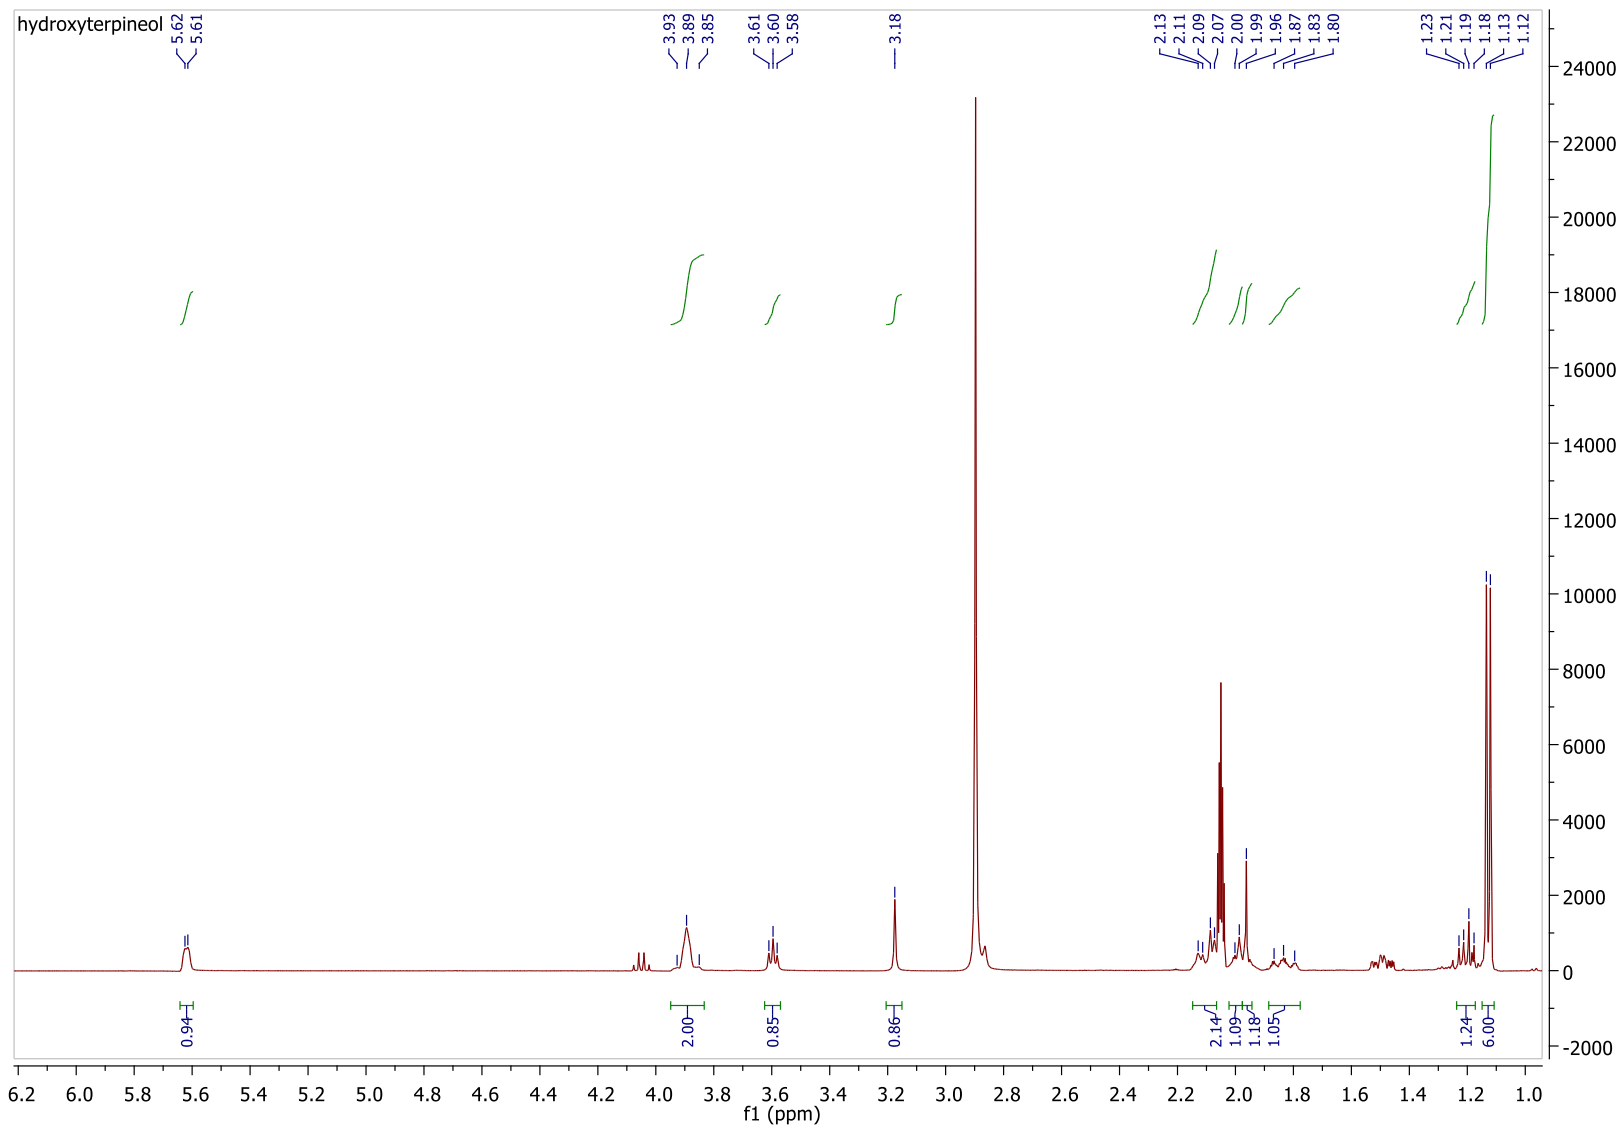

Perillyl alcohol in acetone-d<sub>6</sub>

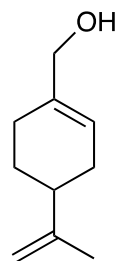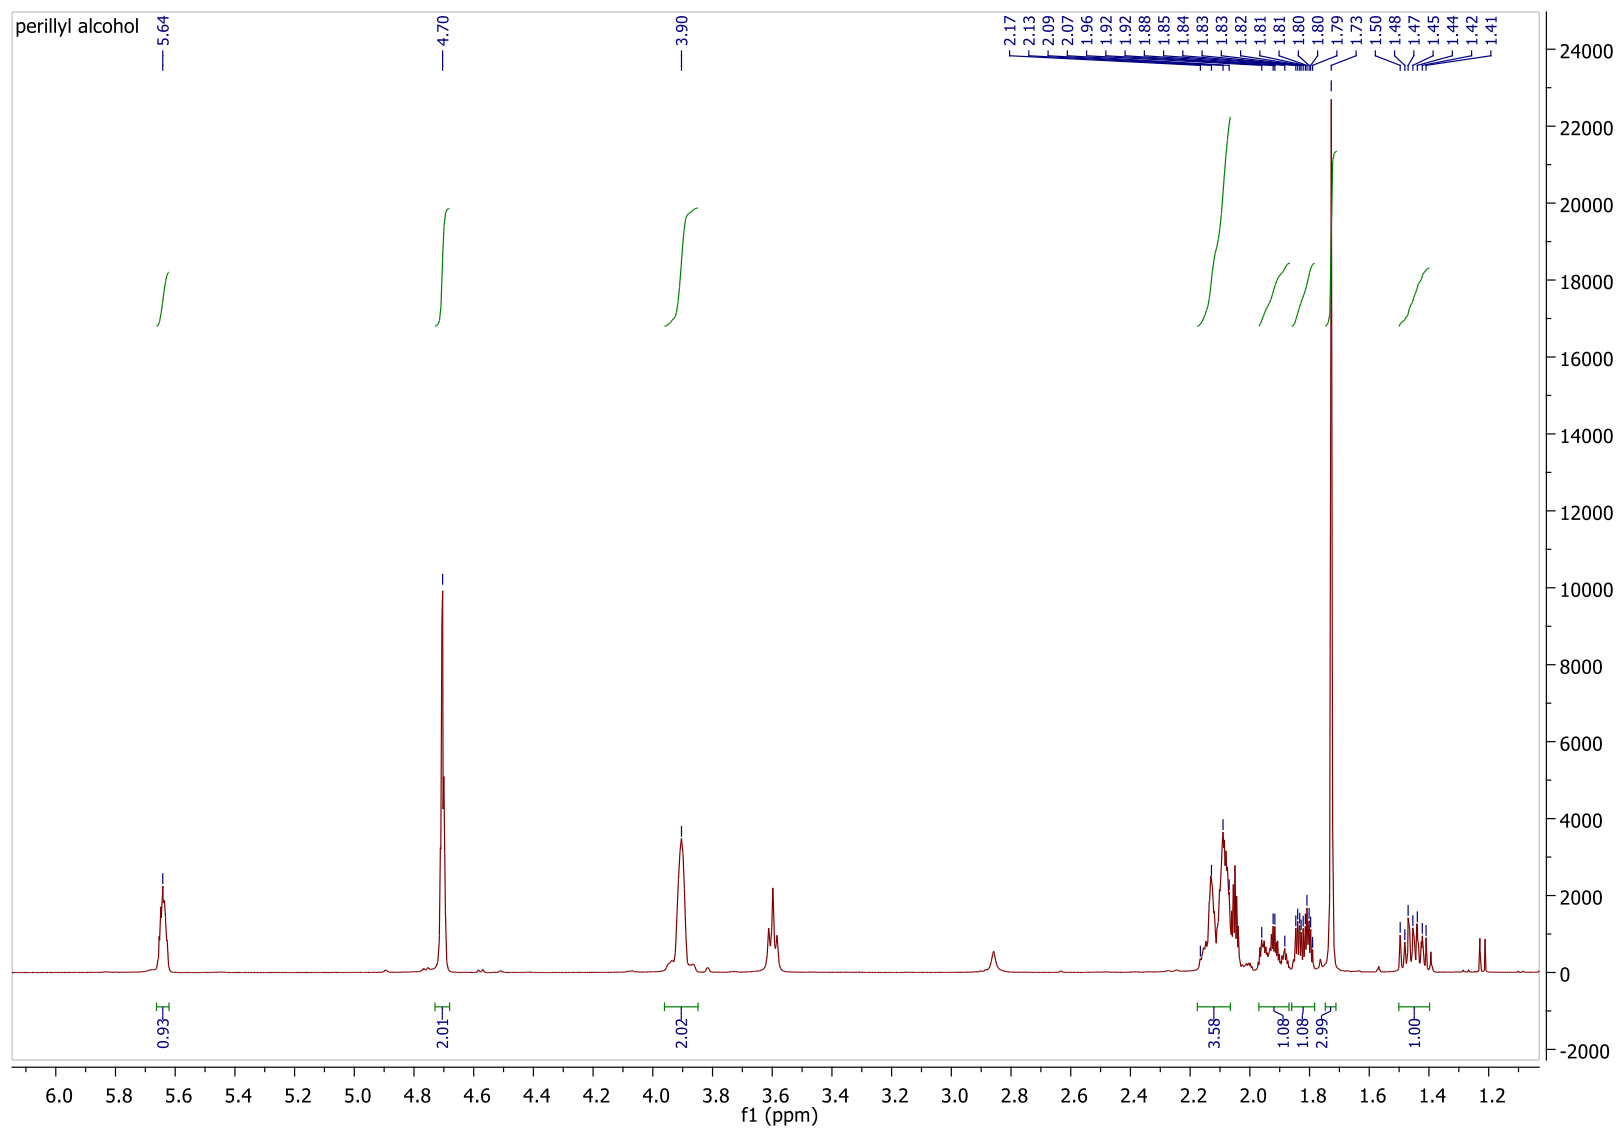

# Perillaldehyde in acetone-d<sub>6</sub>

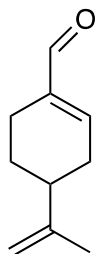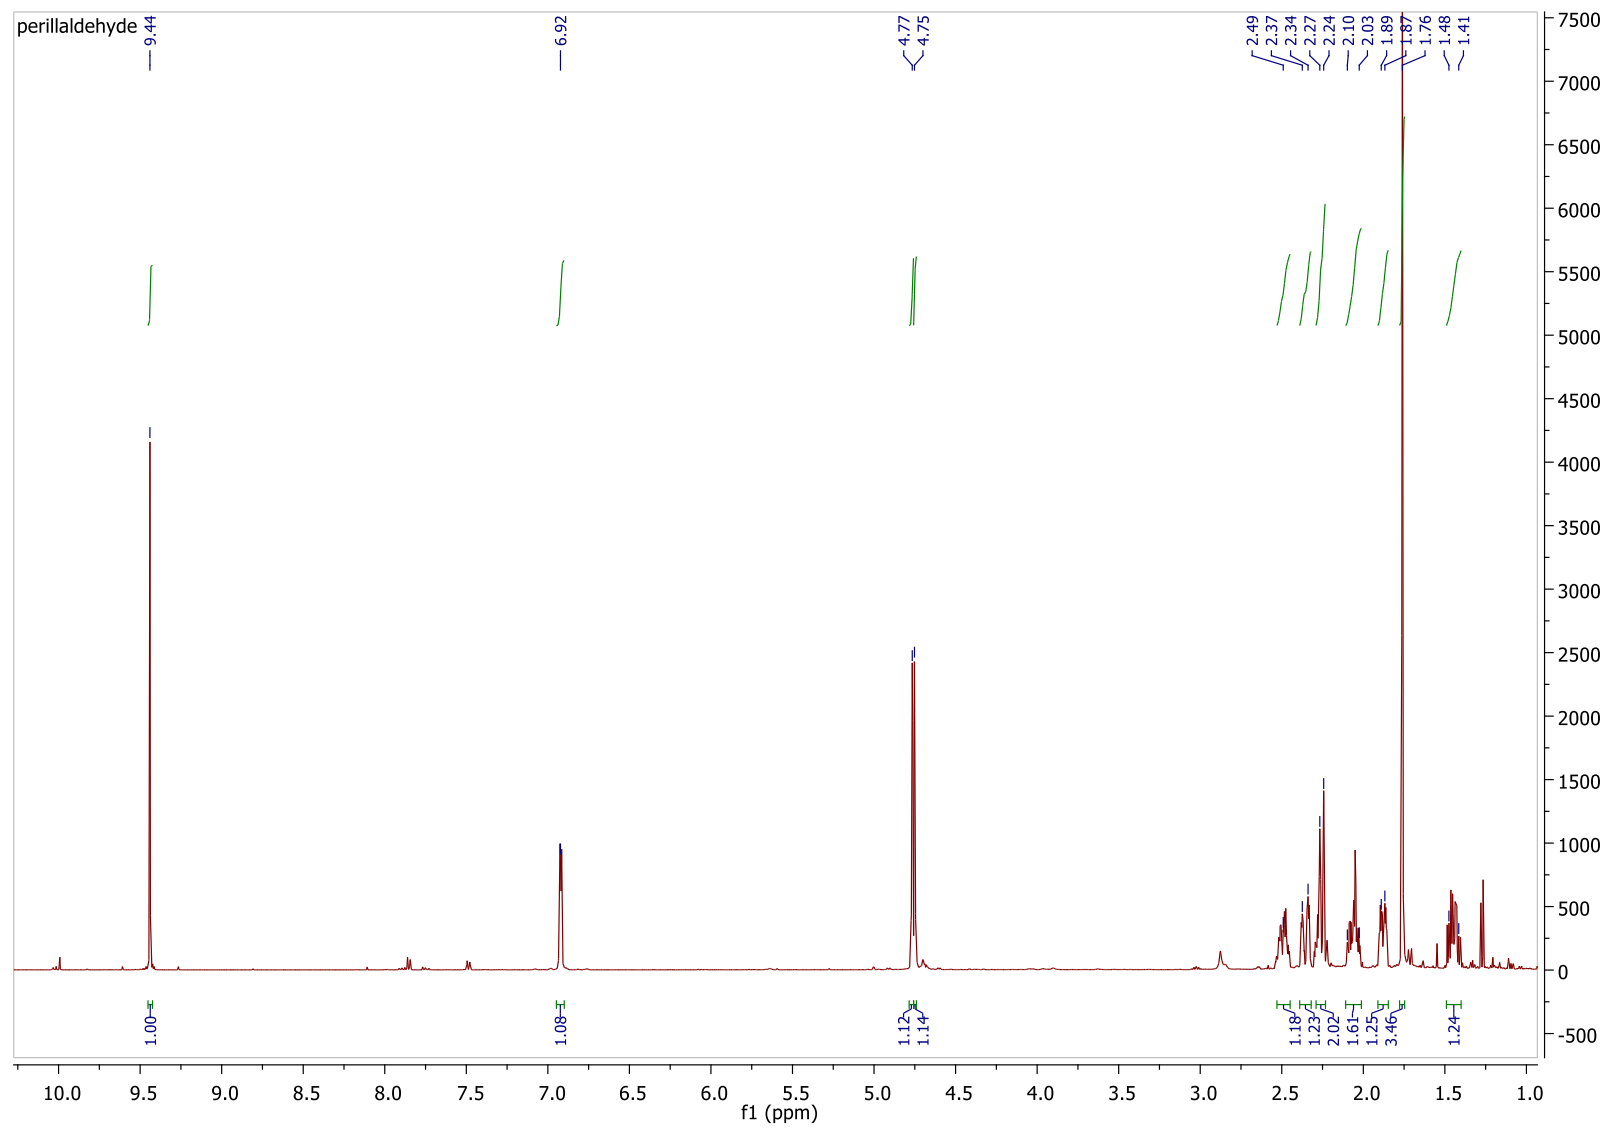

Cuminaldehyde in acetone-d<sub>6</sub>

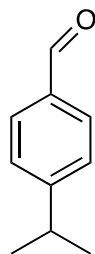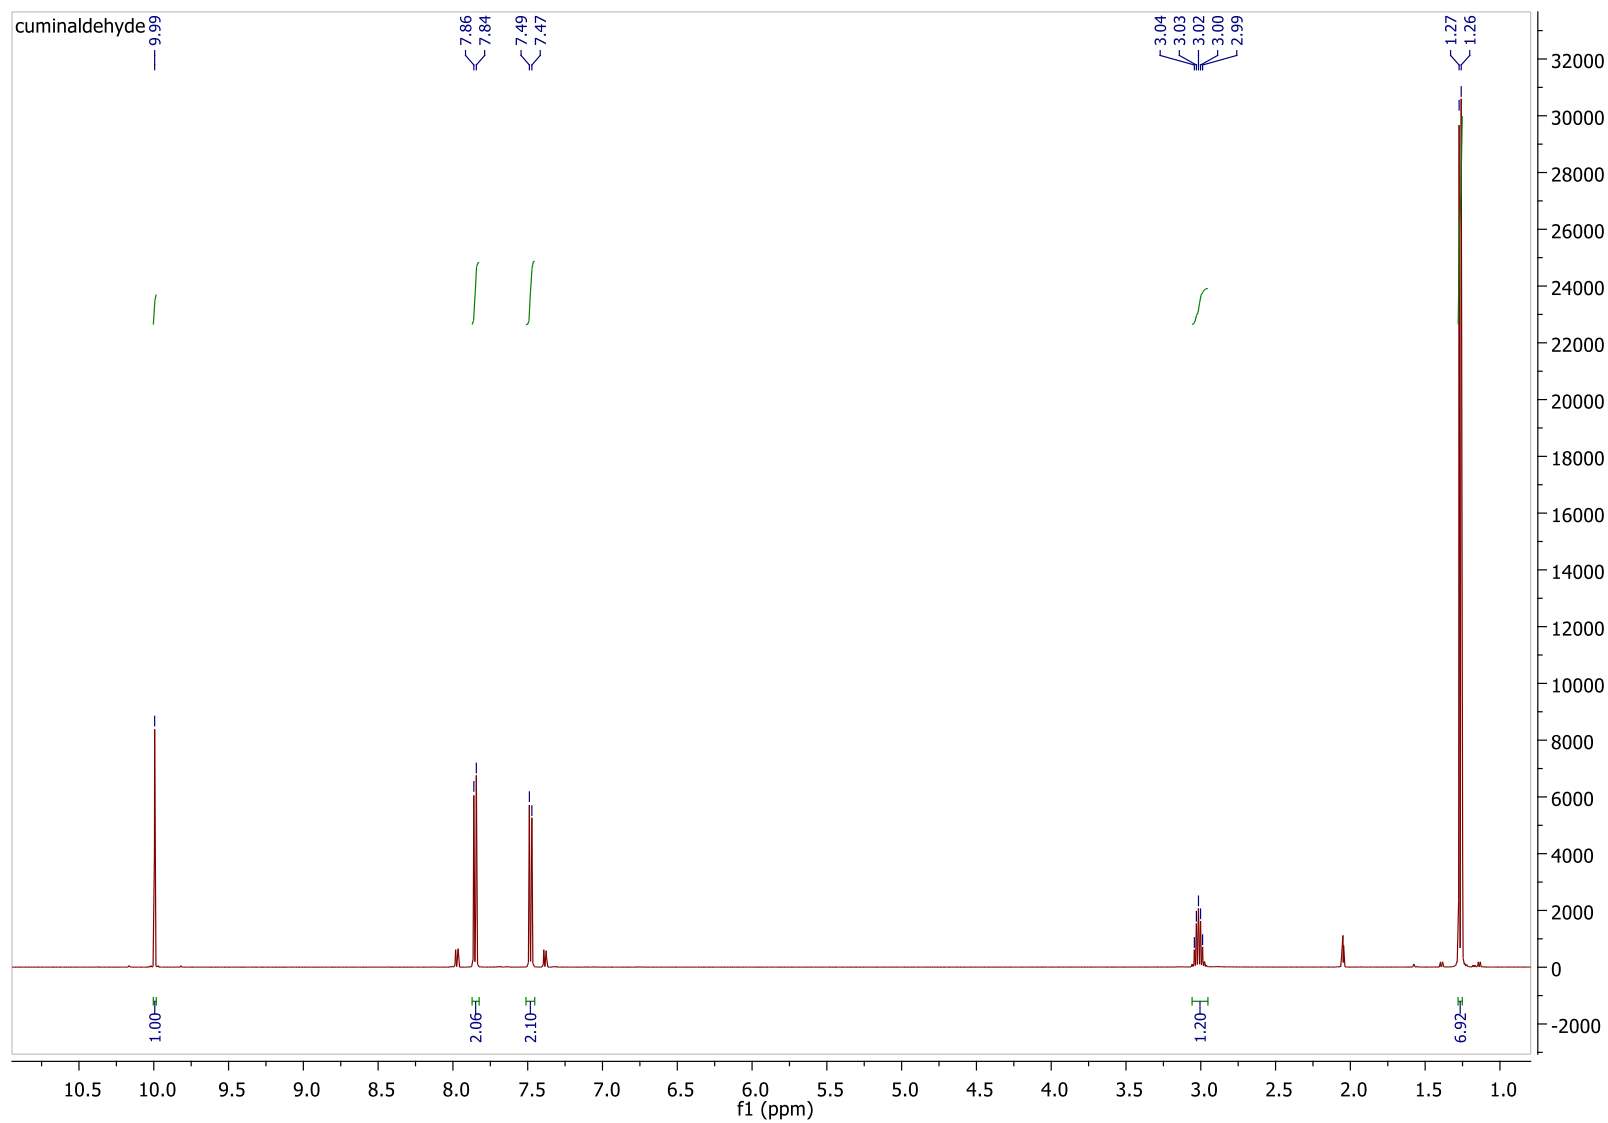

## II. Scale up procedures

Scale-up for the synthesis of  $\beta$ -pinene oxide **2**.

$\beta$ -pinene **1** (38 mmol, 1 eq.), ecocatalyst (200  $\mu$ mol, 0.005 eq. of Mn) and  $\text{NaHCO}_3$  (aq) (200 mmol, 5 eq.) were introduced in a flask containing distilled water (120 mL) and acetone (120 mL) at 30 °C for 10 minutes.  $\text{H}_2\text{O}_2$  (aq) (40 % w/w in  $\text{H}_2\text{O}$ ; 200 mmol, 5 eq.) was added dropwise for 2 h. After 2 h, the suspension was filtered and extracted three times with ethyl acetate. The organic layers were collected together and dried using anhydrous  $\text{MgSO}_4$ . The solvent was then evaporated. The crude was distilled under vacuum with a cooled trap.

Scale-up for the one pot synthesis of 7-hydroxyterpineol **4** from  $\beta$ -pinene **1**.

For the one-pot synthesis,  $\beta$ -pinene **1** (38 mmol, 1 eq.), ecocatalyst (200  $\mu$ mol, 0.005 eq. of Mn) and  $\text{NaHCO}_3$  (s) (200 mmol, 5 eq.) were placed in a mixture of distilled water (120 mL) and acetone (120 mL) at 30 °C for 10 minutes while stirring.  $\text{H}_2\text{O}_2$  (aq) (40 % w/w in  $\text{H}_2\text{O}$ ; 200 mmol, 5 eq.) was added dropwise for 2 h using a syringe-pushing device. After 2 h, oxalic acid (304 mmol, 8 eq.) was added into the mixture. It was stirred for 1 more hour at 30 °C. It was then filtered and extracted three times with ethyl acetate. The organic layers were collected together and extracted with a saturated solution of  $\text{NaHCO}_3$ , then with brine before being dried using anhydrous  $\text{MgSO}_4$ . The solvent was evaporated.
